# Supplementary material for: Automated Quality Control for Sensor Based Symptom Measurement Performed Outside the Lab
Source: PubMed Central journal article supplement (PMC5948536; doi:10.3390/s18041215), 2018-04-16
Supplement: sensors-18-01215-s001.pdf [file sensors-18-01215-s001.pdf]

# Supplementary Material

Table S1:

Clinimetric test protocols, assumptions and commonly encountered protocol violations in the Smartphone-PD project data used to test the quality control framework proposed in this study.

| <b>Test</b> | <b>Protocol</b>                                                                                                                                           | <b>Protocol violations</b>                                                                                                                                                                                                                                                                                                                                                         | <b>Hand-labelling protocol</b>                                                                                                                                                                                                                                                                                                                                                                                                                                                                                                       |
|-------------|-----------------------------------------------------------------------------------------------------------------------------------------------------------|------------------------------------------------------------------------------------------------------------------------------------------------------------------------------------------------------------------------------------------------------------------------------------------------------------------------------------------------------------------------------------|--------------------------------------------------------------------------------------------------------------------------------------------------------------------------------------------------------------------------------------------------------------------------------------------------------------------------------------------------------------------------------------------------------------------------------------------------------------------------------------------------------------------------------------|
| Voice       | Place the phone up to your ear as if making a normal phone call. Take a deep breath, and say “aaah” for as long as you can, at a steady volume and pitch. | <ol style="list-style-type: none"> <li>1. User interactions with the smartphone including taking a phone call, texting or playing a game during test.</li> <li>2. User performs test in loud environment.</li> <li>3. Non-sustained vowel phonation activities including coughing, reading out the instructions on the display, talking to another person, during test.</li> </ol> | <ol style="list-style-type: none"> <li>(1) Vowel sound segments are marked as adherence</li> <li>(2) Anything else is marked as non-adherence</li> </ol>                                                                                                                                                                                                                                                                                                                                                                             |
| Balance     | Place the phone in your pocket. When the buzzer vibrates, stand up straight unaided.                                                                      | <ol style="list-style-type: none"> <li>1. User interactions with the smartphone including taking a phone call, texting or playing a game during test.</li> <li>2. User is jumping or falling during the test.</li> </ol>                                                                                                                                                           | <ol style="list-style-type: none"> <li>(1) Where there is uncertainty in the user’s activity, a non-adherence label is applied</li> <li>(2) Buzzer is labelled as non-adherence</li> <li>(3) Where an interval is confounded with the buzzer, a non-adherence label is given to that interval</li> <li>(4) Where an interval is confounded with an orientation change of the smartphone and the data is otherwise ambiguous, a non-adherence label is given to that interval</li> </ol>                                              |
| Walking     | Stand up and place the phone in your pocket. When the buzzer vibrates, walk forward 20 yards; then turn around and walk back.                             | <ol style="list-style-type: none"> <li>1. User interactions with the smartphone including taking a phone call, texting or playing a game during test.</li> <li>2. Non-walking activities including jumping, falling or standing still.</li> <li>3. User encounters obstacles during walking which interfere with normal walking.</li> </ol>                                        | <ol style="list-style-type: none"> <li>(1) Where there is uncertainty in the user’s activity, a non-adherence label is applied</li> <li>(2) Buzzer is labelled as non-adherence</li> <li>(3) Where an interval is confounded with the buzzer, a non-adherence label is given to that interval</li> <li>(4) Where an interval is confounded with an orientation change of the smartphone and the data is otherwise ambiguous, a non-adherence label is given to that interval</li> <li>(5) A turn is labelled as adherence</li> </ol> |

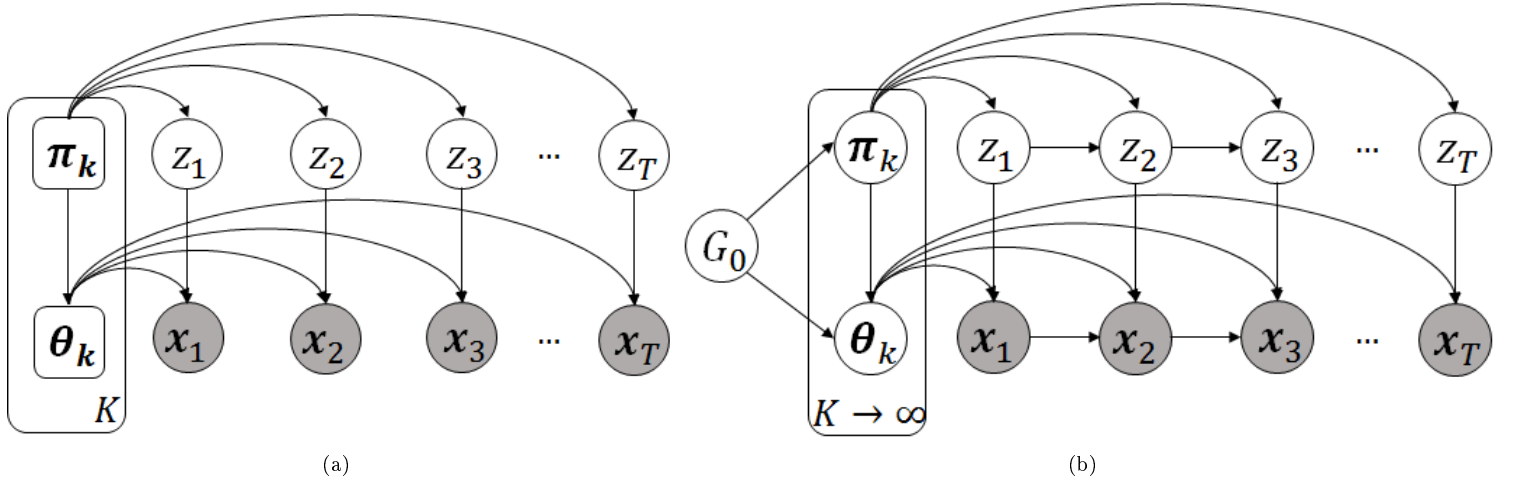

Figure S1: Probabilistic graphical models for (a) Gaussian mixture model (GMM) and (b) nonparametric switching autoregressive (AR) model. The GMM component parameters  $\theta_k$  are the mean and the variance of data associated with component  $k$ . By contrast, the component parameters  $\theta_k$  for the switching AR consist of the AR coefficients  $A_1^k, \dots, A_r^k$  and the AR error parameters  $\mu_k$  and  $\sigma_k$ . Parameter  $\pi_k$  denotes the mixing coefficients and the transition matrix for the GMM and the switching AR, respectively. In the parametric GMM  $\pi_k$  and  $\theta_k$  are fixed. In the nonparametric switching AR  $\pi_k$  and  $\theta_k$  are modeled with an HDP prior, where  $G = \{G_1, \dots, G_{K+}\} \sim \text{HDP}(\alpha, \gamma, \theta_0)$ . Hyperparameter  $\theta_0$  denotes the conjugate prior over the  $A$ 's, the  $\mu$ 's and the  $\sigma$ 's. See main text for further description of the HDP and its concentration parameters  $\alpha$  and  $\gamma$ .
